# Supplementary material for: Evaluation of Planned Subgroup Analysis in Protocols of Randomized Clinical Trials
Source: PubMed Central journal article supplement (PMC8552052; doi:10.1001/jamanetworkopen.2021.31503), 2021-10-27
Supplement: jamanetwopen-e2131503-s001.pdf [file jamanetwopen-e2131503-s001.pdf]

\*Indicates required information. Only first name, last name, and suffix will appear in PubMed.

| <b>*Group Name(s): Adherence to SPIRIT Recommendations Study Group</b> |                   |                              |                         |                                                                                                                                                                                                                                                                                                                              |                                                 |                                                                                      |                                                                                                   |
|------------------------------------------------------------------------|-------------------|------------------------------|-------------------------|------------------------------------------------------------------------------------------------------------------------------------------------------------------------------------------------------------------------------------------------------------------------------------------------------------------------------|-------------------------------------------------|--------------------------------------------------------------------------------------|---------------------------------------------------------------------------------------------------|
| <b>*First Name and Middle Initial(s)</b>                               | <b>*Last Name</b> | <b>*Suffix (eg, Jr, III)</b> | <b>Academic Degrees</b> | <b>Institution</b>                                                                                                                                                                                                                                                                                                           | <b>Location (city, state/province, country)</b> | <b>Role or Contribution to the ASPIRE project, eg, chair, principal investigator</b> | <b>Group (if more than 1 Group listed in the byline) and/or Subgroup (eg, Steering Committee)</b> |
| Belinda                                                                | von Niederhäusern |                              | PhD                     | Roche Pharma AG                                                                                                                                                                                                                                                                                                              | Grenzach-Wyhlen, Germany                        | Coordination and data collection                                                     |                                                                                                   |
| Benjamin                                                               | Speich            |                              | PhD                     | Basel Institute for Clinical Epidemiology and Biostatistics, Department of Clinical Research, University of Basel and University Hospital and Oxford Clinical Trials Research Unit / Centre for Statistics in Medicine, Nuffield Department of Orthopaedics, Rheumatology and Musculoskeletal Sciences, University of Oxford | Basel, Switzerland and Oxford UK                | Coordination and data collection                                                     |                                                                                                   |
| Elena                                                                  | Ojeda-Ruiz        |                              | MD, MSc                 | Basel Institute for Clinical Epidemiology and Biostatistics, Department of Clinical Research, University of Basel and University Hospital and Infanta Elena University Hospital, Preventive Medicine Department                                                                                                              | Basel, Switzerland and Madrid, Spain            | Data collection                                                                      |                                                                                                   |
| Anette                                                                 | Blümle            |                              | PhD                     | Cochrane Hungary, Clinical Centre of the University of Pécs, Medical School, University of Pécs                                                                                                                                                                                                                              | Pécs, Hungary                                   | Data collection                                                                      |                                                                                                   |
| Dominik                                                                | Mertz             |                              | MD, MSc                 | Department of Health Research Methods, Evidence, and Impact, McMaster University                                                                                                                                                                                                                                             | Hamilton, Canada                                | Data collection                                                                      |                                                                                                   |
| Ayodele                                                                | Odutayo           |                              | MD, PhD                 | Oxford Clinical Trials Research Unit / Centre for Statistics in Medicine, Nuffield Department of Orthopaedics, Rheumatology and Musculoskeletal Sciences, University of Oxford and Department of Anesthesia, McMaster University                                                                                             | Oxford, UK and Hamilton Canada                  | Data collection                                                                      |                                                                                                   |
| Yuki                                                                   | Tomonaga          |                              | PhD                     | Epidemiology, Biostatistics and Prevention Institute, University of Zurich                                                                                                                                                                                                                                                   | Zurich, Switzerland                             | Data collection                                                                      |                                                                                                   |

\*Indicates required information. Only first name, last name, and suffix will appear in PubMed.

| *First Name and Middle Initial(s) | *Last Name   | *Suffix (eg, Jr, III) | Academic Degrees | Institution                                                                                                                                                                                                                                                                                               | Location (city, state/province, country)  | Role or Contribution to the ASPIRE project, eg, chair, principal investigator | Group (if more than 1 Group listed in the byline) and/or Subgroup (eg, Steering Committee) |
|-----------------------------------|--------------|-----------------------|------------------|-----------------------------------------------------------------------------------------------------------------------------------------------------------------------------------------------------------------------------------------------------------------------------------------------------------|-------------------------------------------|-------------------------------------------------------------------------------|--------------------------------------------------------------------------------------------|
| Alain                             | Amstutz      |                       | MD               | Basel Institute for Clinical Epidemiology and Biostatistics, Department of Clinical Research, University of Basel and University Hospital and Swiss Tropical and Public Health Institute, University of Basel, and Department of Infectious Diseases and Hospital Epidemiology, University Hospital Basel | Basel, Switzerland                        | Data collection                                                               |                                                                                            |
| Christiane                        | Pauli-Magnus |                       | MD               | Department of Clinical Research, Clinical Trial Unit, University Hospital Basel and University of Basel                                                                                                                                                                                                   | Basel, Switzerland                        | Data collection                                                               |                                                                                            |
| Viktoria                          | Gloy         |                       | PhD              | Basel Institute for Clinical Epidemiology and Biostatistics, Department of Clinical Research, University of Basel and University Hospital                                                                                                                                                                 | Basel, Switzerland                        | Data collection                                                               |                                                                                            |
| Szimonetta                        | Lohner       |                       | MD, PhD          | Cochrane Hungary, Clinical Centre of the University of Pécs, Medical School, University of Pécs                                                                                                                                                                                                           | Pécs, Hungary                             | Data collection                                                               |                                                                                            |
| Karin                             | Bischoff     |                       | MSc              | Institute for Evidence in Medicine, Medical Center – University of Freiburg, Faculty of Medicine, University of Freiburg and Cochrane Germany, Cochrane Germany Foundation                                                                                                                                | Freiburg, Germany                         | Data collection                                                               |                                                                                            |
| Katharina                         | Wollmann     |                       | MSc              | Institute for Evidence in Medicine, Medical Center – University of Freiburg, Faculty of Medicine, University of Freiburg and Cochrane Germany, Cochrane Germany Foundation                                                                                                                                | Freiburg, Germany                         | Data collection                                                               |                                                                                            |
| Laura                             | Rehner       |                       | MSc              | Institute for Evidence in Medicine, Medical Center – University of Freiburg, Faculty of Medicine, University of Freiburg and Department of Epidemiology and Community Health, Institute for Community Medicine, University Medicine Greifswald                                                            | Freiburg, Germany and Greifswald, Germany | Data collection                                                               |                                                                                            |

\*Indicates required information. Only first name, last name, and suffix will appear in PubMed.

| *First Name and Middle Initial(s) | *Last Name     | *Suffix (eg, Jr, III) | Academic Degrees | Institution                                                                                                                                                                | Location (city, state/province, country)      | Role or Contribution to the ASPIRE project, eg, chair, principal investigator | Group (if more than 1 Group listed in the byline) and/or Subgroup (eg, Steering Committee) |
|-----------------------------------|----------------|-----------------------|------------------|----------------------------------------------------------------------------------------------------------------------------------------------------------------------------|-----------------------------------------------|-------------------------------------------------------------------------------|--------------------------------------------------------------------------------------------|
| Joerg J.                          | Meerpohl       |                       | MD, MSc          | Institute for Evidence in Medicine, Medical Center – University of Freiburg, Faculty of Medicine, University of Freiburg and Cochrane Germany, Cochrane Germany Foundation | Freiburg, Germany                             | Data collection                                                               |                                                                                            |
| Alain                             | Nordmann       |                       | MD, MSc          | Department of Clinical Research, Basel Institute for Clinical Epidemiology and Biostatistics, University Hospital Basel and University of Basel                            | Basel, Switzerland                            | Data collection                                                               |                                                                                            |
| Katharina                         | Klatte         |                       | MSc              | Basel Institute for Clinical Epidemiology and Biostatistics, Department of Clinical Research, University of Basel and University Hospital                                  | Basel, Switzerland                            | Data collection                                                               |                                                                                            |
| Nilabh                            | Ghosh          |                       | MSc              | Basel Institute for Clinical Epidemiology and Biostatistics, Department of Clinical Research, University of Basel and University Hospital                                  | Basel, Switzerland                            | Data collection                                                               |                                                                                            |
| Kimberly                          | McCord         |                       | PhD              | Department of Clinical Research, Basel Institute for Clinical Epidemiology and Biostatistics, University Hospital Basel and University of Basel                            | Basel, Switzerland                            | Data collection                                                               |                                                                                            |
| Sirintip                          | Sricharoenchai |                       | MD, MSc          | Department of Clinical Research, Basel Institute for Clinical Epidemiology and Biostatistics, University Hospital Basel and University of Basel                            | Basel, Switzerland                            | Data collection                                                               |                                                                                            |
| Jason W                           | Busse          |                       | PhD              | Department of Health Research Methods, Evidence, and Impact, McMaster University, Hamilton, Canada & Department of Anesthesia, McMaster University                         | Hamilton, Canada                              | Data collection                                                               |                                                                                            |
| Arnav                             | Agarwal        |                       | MD               | Department of Medicine, University of Toronto and Department of Health Research Methods, Evidence, and Impact, McMaster University                                         | Toronto, Ontario, Canada and Hamilton, Canada | Data collection                                                               |                                                                                            |
| Ramon                             | Saccilotto     |                       | MD, MSc          | Department of Clinical Research, Basel Institute for Clinical Epidemiology and Biostatistics, University Hospital Basel and University of Basel                            | Basel, Switzerland                            | Development of web-tool for data extraction                                   |                                                                                            |

\*Indicates required information. Only first name, last name, and suffix will appear in PubMed.

| *First Name and Middle Initial(s) | *Last Name   | *Suffix (eg, Jr, III) | Academic Degrees | Institution                                                                                                                                                                                                                                                                                              | Location (city, state/province, country)                      | Role or Contribution to the ASPIRE project, eg, chair, principal investigator | Group (if more than 1 Group listed in the byline) and/or Subgroup (eg, Steering Committee) |
|-----------------------------------|--------------|-----------------------|------------------|----------------------------------------------------------------------------------------------------------------------------------------------------------------------------------------------------------------------------------------------------------------------------------------------------------|---------------------------------------------------------------|-------------------------------------------------------------------------------|--------------------------------------------------------------------------------------------|
| Matthias                          | Schwenkgenks |                       | PhD              | Epidemiology, Biostatistics and Prevention Institute, University of Zurich, Zurich, Switzerland & Institute of Pharmaceutical Medicine (ECPM), University of Basel                                                                                                                                       | Basel, Switzerland                                            | Data collection                                                               |                                                                                            |
| Giusi                             | Moffa        |                       | PhD              | Department of Clinical Research, Basel Institute for Clinical Epidemiology and Biostatistics, University Hospital Basel and University of Basel and Department of Mathematics and Computer Science, University of Basel                                                                                  | Basel, Switzerland                                            | Data collection                                                               |                                                                                            |
| Lars G                            | Hemkens      |                       | MD, MPH          | Basel Institute for Clinical Epidemiology and Biostatistics, Department of Clinical Research, University of Basel and University Hospital; Meta-Research Innovation Center at Stanford (METRICS), Stanford University; and Meta-Research Innovation Center Berlin (METRIC-B), Berlin Institute of Health | Basel, Switzerland; Stanford, California, US; Berlin, Germany | Data collection                                                               |                                                                                            |
| Sally                             | Hopewell     |                       | PhD              | Oxford Clinical Trials Research Unit / Centre for Statistics in Medicine, Nuffield Department of Orthopaedics, Rheumatology and Musculoskeletal Sciences, University of Oxford                                                                                                                           | Oxford, UK                                                    | Conception, design, and data collection                                       |                                                                                            |
| Erik                              | von Elm      |                       | MD, MSc          | Cochrane Switzerland, Centre for Primary Care and Public Health (Unisanté), University of Lausanne                                                                                                                                                                                                       | Lausanne, Switzerland                                         | Conception, design, and data collection                                       |                                                                                            |
| Jacqueline                        | Wong         |                       | PhD              | Department of Health Research Methods, Evidence, and Impact, McMaster University                                                                                                                                                                                                                         | Hamilton, Canada                                              | Data collection                                                               |                                                                                            |
| Ngai                              | Chow         |                       | PhD              | Department of Health Research Methods, Evidence, and Impact, McMaster University                                                                                                                                                                                                                         | Hamilton, Canada                                              | Data collection                                                               |                                                                                            |
| Patrik                            | Jiho Hong    |                       | PhD              | Department of Health Research Methods, Evidence, and Impact, McMaster University, Hamilton, Canada & Department of Anesthesiology and Pain Medicine, University of Toronto                                                                                                                               | Toronto, Ontario, Canada                                      | Data collection                                                               |                                                                                            |
